# Supplementary material for: Effect of task-specific training on Eph/ephrin expression after stroke
Source: PubMed Central journal article supplement — BMB Rep. 2016 Nov 30;49(11):635–40. doi: 10.5483/BMBRep.2016.49.11.172 (PMC5346325; doi:10.5483/bmbrep.2016.49.11.172), 2016-11-30
Supplement: BMB-49-635_suppl.pdf [file BMB-49-635_suppl.pdf]

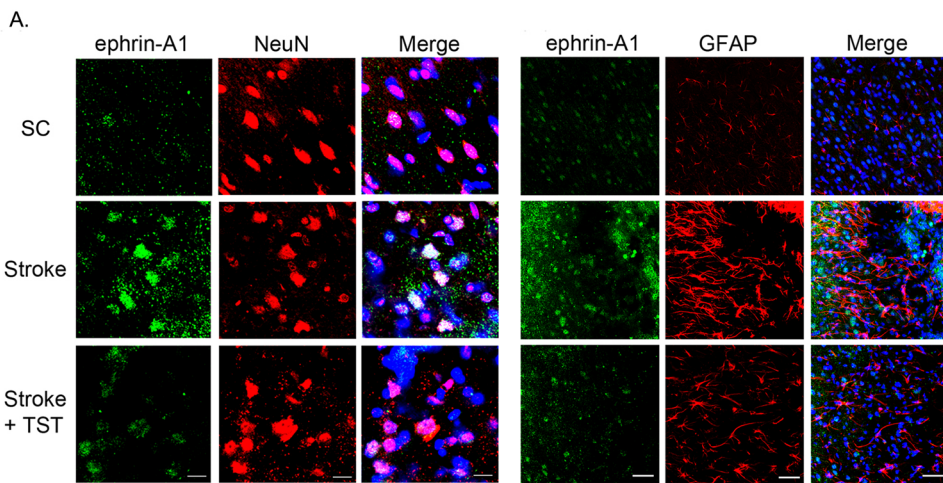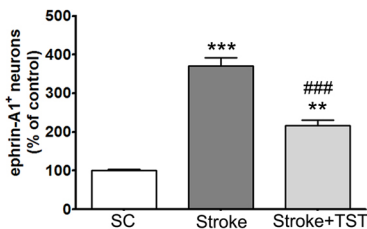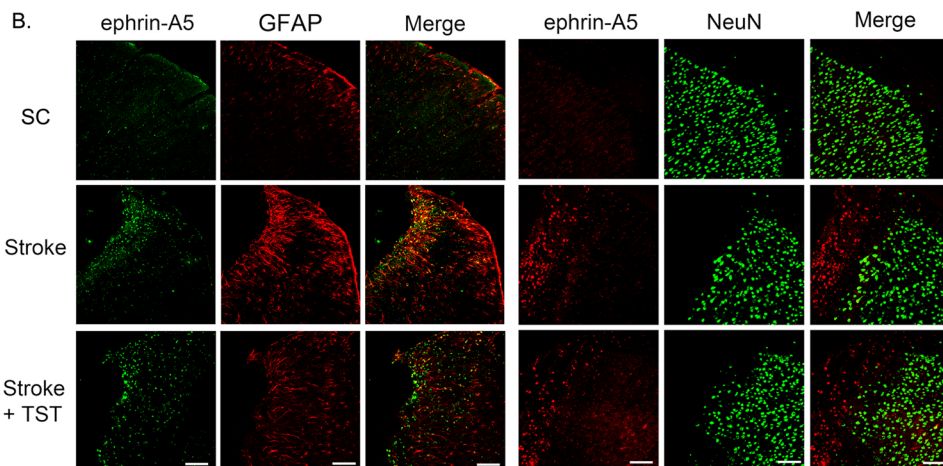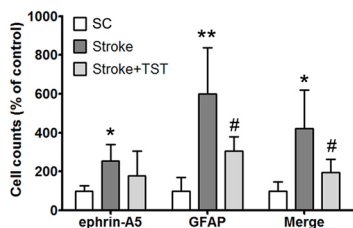

**Supplementary Fig. 1. Effect of TST on the expressions of ephrin-A1 and ephrin-A5 in the cortex after stroke.** (A) Representative photomicrograph of ephrin-A1 immunostaining in the peri-infarct regions of brain at 2 weeks after stroke. Immunostaining of ephrin-A1 (green), NeuN (red), and Topo-3 (blue) in cells of the peri-infarct regions in the cortex. Ephrin-A1 (green) and NeuN (red) were visualized in the peri-infarct regions at 2 weeks after stroke. Ephrin-A1 expression in neurons is demonstrated as white staining after merging green (ephrin-A1), red (NeuN) and blue (Topo-3) images. Scale bars = 10  $\mu$ m. SC: sham control; Stroke: photothrombotic ischemic stroke; Stroke + TST: 1 w after TST initiated at 5 days after stroke. Counts of ephrin-A1-positive neurons of total neurons. Results are presented as the mean  $\pm$  SEM, n = 5/group. \*\*p<0.01, \*\*\*p<0.001 vs SC. ###p<0.001 vs Stroke. Immunostaining of ephrin-A1 (green), GFAP in astrocytes (red), and Topo-3 (blue) of the peri-infarct regions. Scale bars = 50  $\mu$ m. (B) Immunostaining of ephrin-A5 (green) and GFAP (red) in cells of the peri-infarct regions in the cortex. Ephrin-A5 expression in astrocytes is demonstrated as yellow staining after merging green (ephrin-A5) and red (GFAP) images. Scale bars = 100  $\mu$ m. Counts of ephrin-A5-positive astrocytes of total cells. Results are presented as the mean  $\pm$  SEM, n = 5/group. \*p<0.05, \*\*p<0.01, \*\*\*p<0.001 vs SC. Immunostaining of ephrin-A5 (green) and NeuN (red) in cells of the peri-infarct regions in the cortex. Ephrin-A5 (green) and NeuN (red) were visualized in the peri-infarct regions at 2 weeks after stroke. Scale bars = 100  $\mu$ m.

## Supplementary table 1. List of primary antibodies

| Antibody             | dilution | Source code | Source                                       |
|----------------------|----------|-------------|----------------------------------------------|
| anti-EphA2           | 1:200    | sc-924      | Santa Cruz Biotechnology, Dallas, Texas, USA |
| anti-EphA4           | 1:200    | sc-921      | Santa Cruz Biotechnology, Dallas, Texas, USA |
| anti-EphB1           | 1:200    | sc-926      | Santa Cruz Biotechnology, Dallas, Texas, USA |
| anti-ephrin-A1       | 1:200    | sc-911      | Santa Cruz Biotechnology, Dallas, Texas, USA |
| anti-ephrin-A2       | 1:200    | sc-912      | Santa Cruz Biotechnology, Dallas, Texas, USA |
| anti-ephrin-A5       | 1:500    | ab-60705    | Abcam, Cambridge, UK                         |
| anti-ephrin-B1       | 1:200    | sc-1011     | Santa Cruz Biotechnology, Dallas, Texas, USA |
| anti-ephrin-B3       | 1:200    | sc-9934     | Santa Cruz Biotechnology, Dallas, Texas, USA |
| anti-GFAP            | 1:1000   | MAB3402     | EMD Millipore, Darmstadt, Germany            |
| anti-GFAP            | 1:1000   | sc-6171     | Santa Cruz Biotechnology, Dallas, Texas, USA |
| anti- $\beta$ -actin | 1:2000   | A5441       | Sigma-Aldrich, St. Louis, MO, USA            |
| anti-NeuN            | 1:1000   | MAB377      | EMD Millipore, Darmstadt, Germany            |
| anti-NeuN            | 1:1000   | ABN78       | EMD Millipore, Darmstadt, Germany            |
